# Supplementary material for: Demographic, socioeconomic, and biological correlates of hypertension in an adult population: evidence from the Bangladesh demographic and health survey 2017–18
Source: PubMed Central journal article supplement (PMC8235611; doi:10.1186/s12889-021-11234-5), 2021-06-26

Predictive margin with 95% CIs

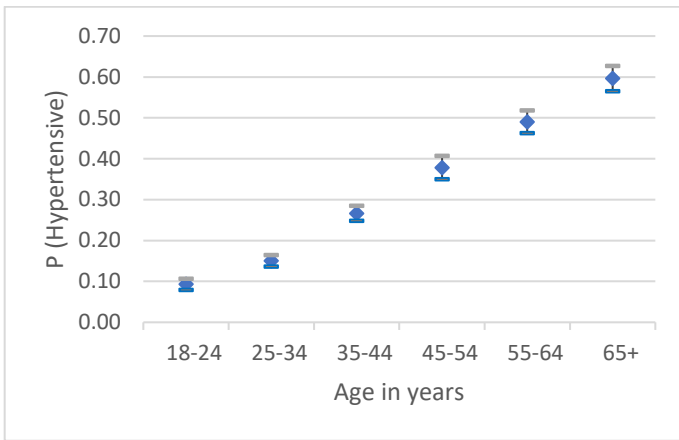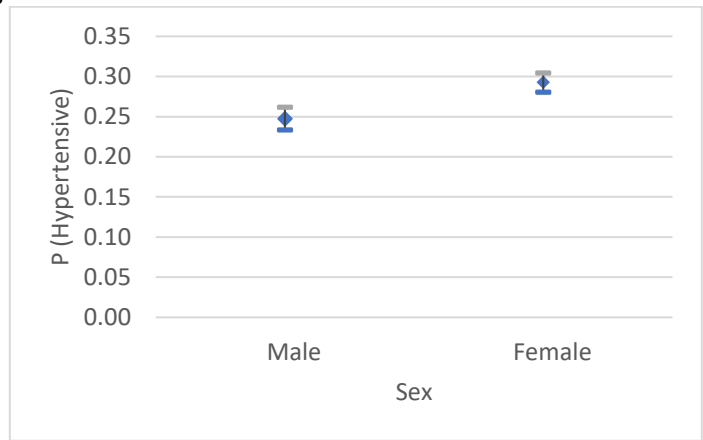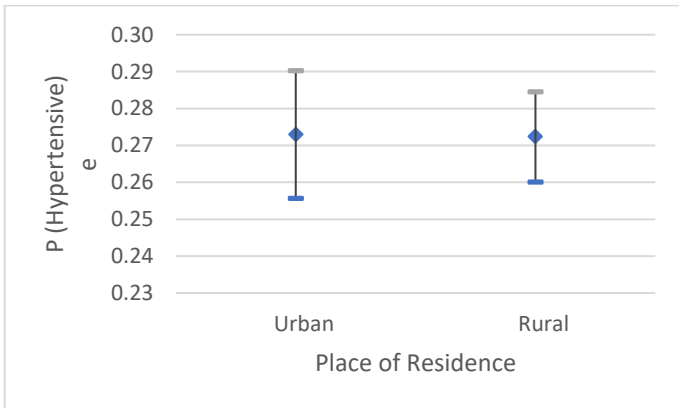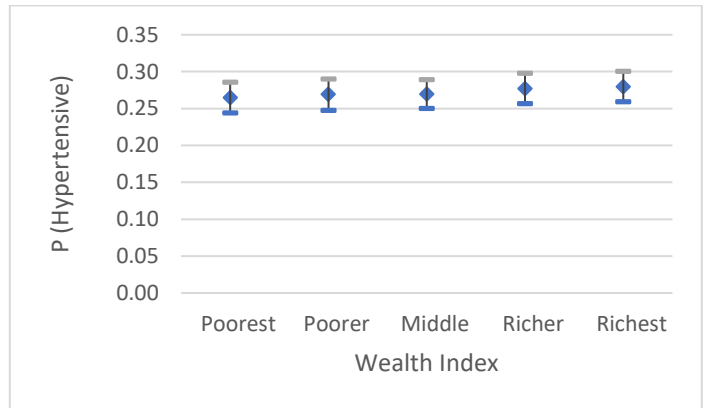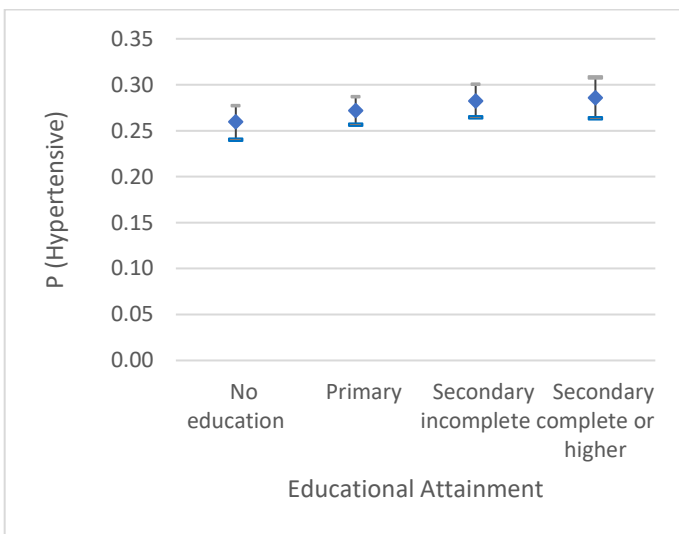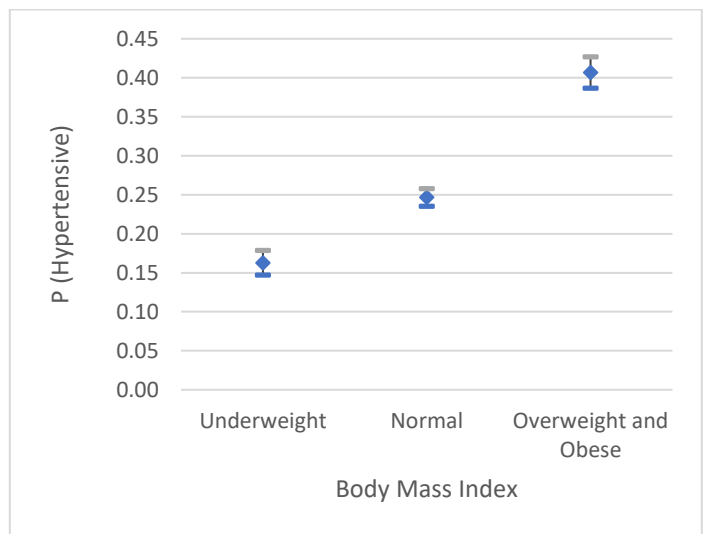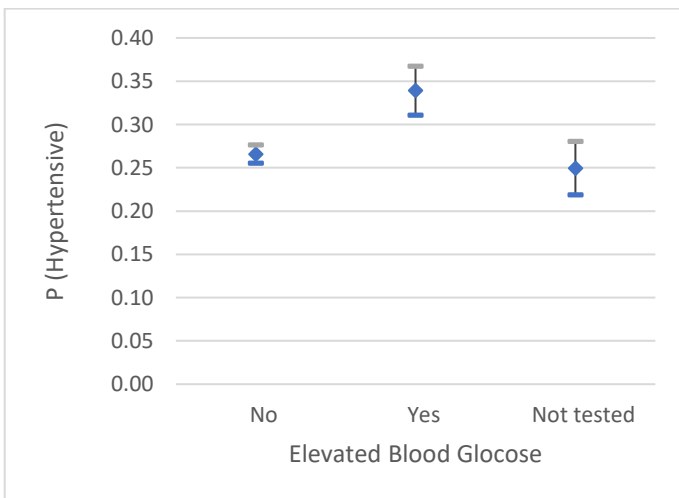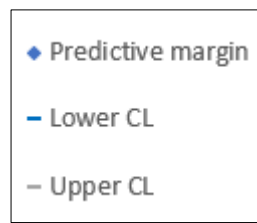

Supplement: 12889_2021_11234_MOESM1_ESM.pdf [file 12889_2021_11234_MOESM1_ESM.pdf]
